# Supplementary material for: Zinc‐Modified Sulfonated Polyetheretherketone Surface with Immunomodulatory Function for Guiding Cell Fate and Bone Regeneration
Source: PubMed Central journal article supplement (PMC6193167; doi:10.1002/advs.201800749), 2018-08-07
Supplement: ADVS-5-1800749-s001.pdf [file ADVS-5-1800749-s001.pdf]

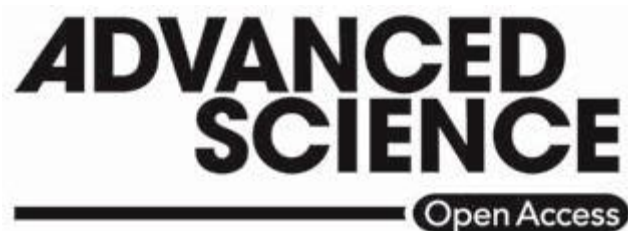

## Supporting Information

for *Adv. Sci.*, DOI: 10.1002/advs.201800749

Zinc-Modified Sulfonated Polyetheretherketone Surface with Immunomodulatory Function for Guiding Cell Fate and Bone Regeneration

*Wei Liu, Jinhua Li, Mengqi Cheng, Qiaojie Wang, Kelvin W. K. Yeung,\* Paul K. Chu,\* and Xianlong Zhang\**

## Supporting Information

**Zinc-Modified Sulfonated Polyetheretherketone Surface with Immunomodulatory Function for Guiding Cell Fate and Bone Regeneration**

Wei Liu, Jinhua Li, Mengqi Cheng, Qiaojie Wang, Kelvin W. K. Yeung\*, Paul K. Chu\*, and Xianlong Zhang\*

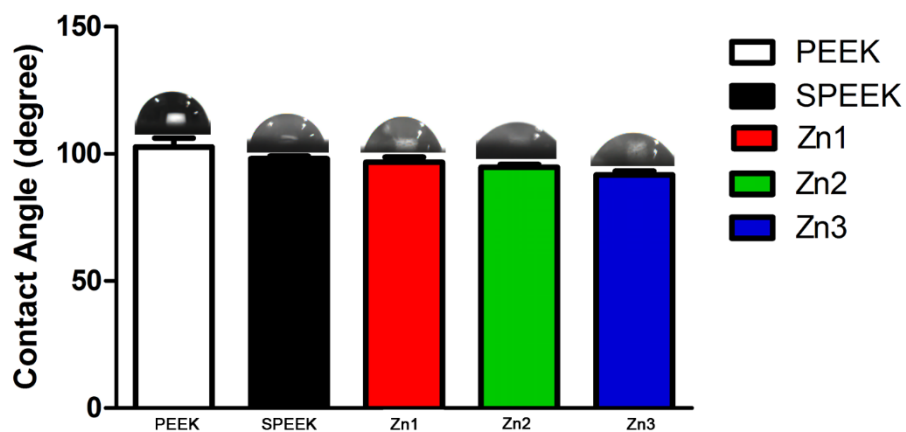

**Figure S1.** Measurement results of water contact angle of the samples.

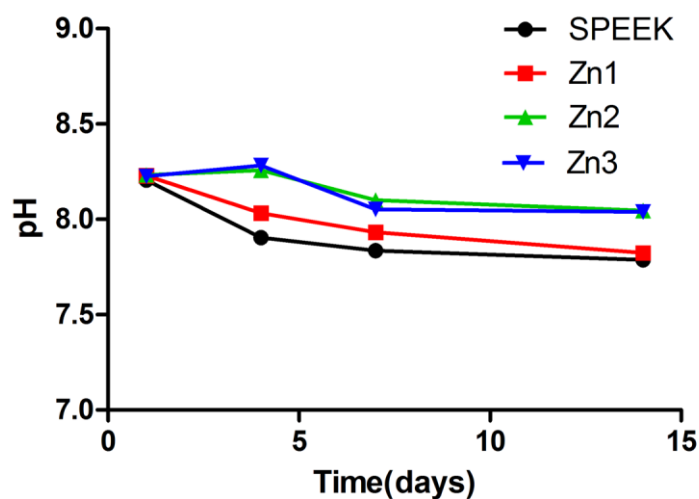

**Figure S2.** pH values of different samples immersed in DMEM medium for different times.

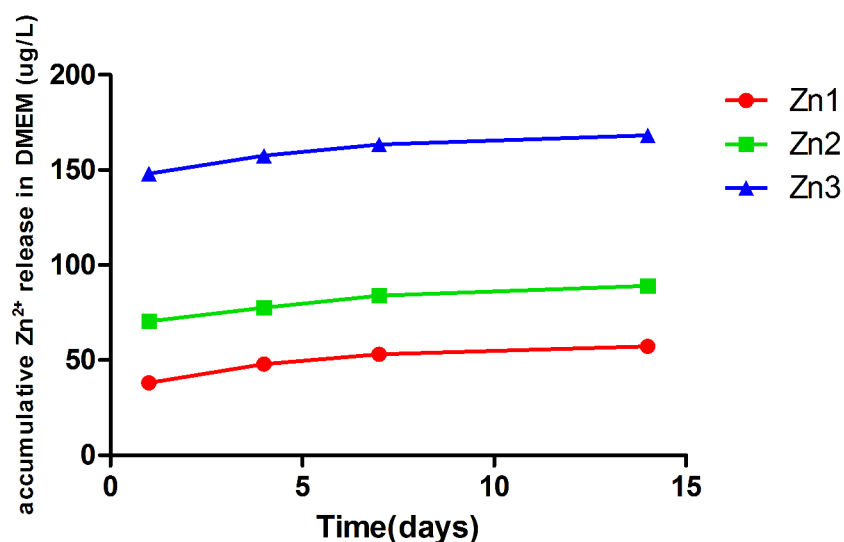

**Figure S3.** Zn concentrations of different samples immersed in DMEM medium for different time.

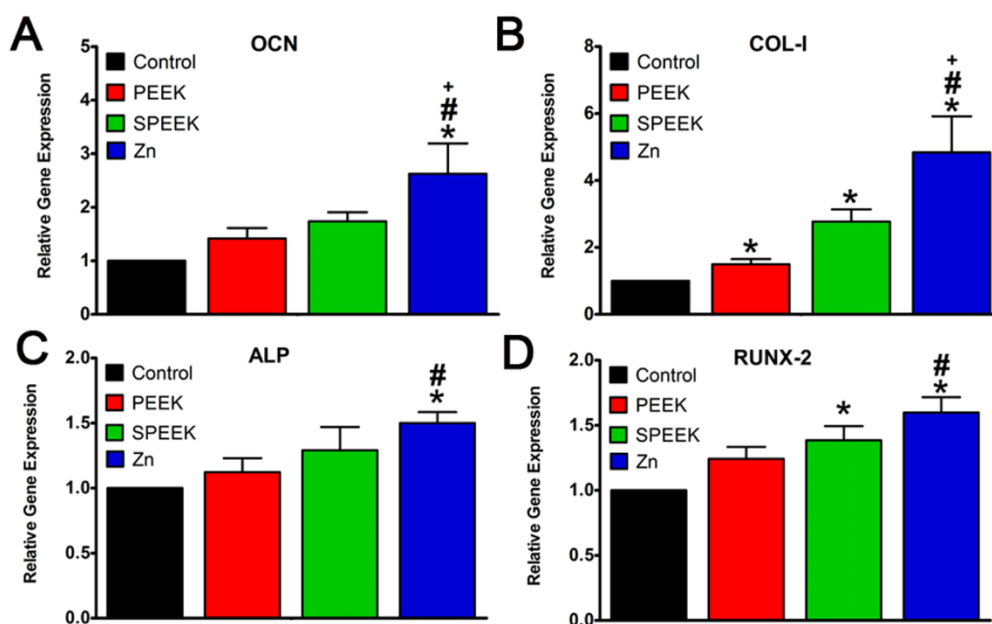

**Figure S4.** Osteogenic related genes expression of rBMSC cultured in conditioned medium by RT-PCR at day 14. (\*, # and + represent  $p < 0.05$  when compared with Control, PEEK, SPEEK respectively).

**Table S1.** The Zn content and bonding strength of Zn coating for Zn-coated SPEEK.

| Sample           | Zn1-SPEEK | Zn2-SPEEK | Zn3-SPEEK |
|------------------|-----------|-----------|-----------|
| Zn content       | 3.57%     | 6.73%     | 15.97%    |
| Bonding strength | 5.2 MPa   | 5.4 MPa   | 5.5 MPa   |

**Table S2.** Primers used in the RT-PCR test of RAW264.7 cells.

| Gene           | Primers Sequence (F, forward; R, reverse; 5'-3')       | Product Size (bp) |
|----------------|--------------------------------------------------------|-------------------|
| CD206          | F: TACTTGGACGGATAGATGGAGG<br>R: CATAGAAAGGAATCCACGCAGT | 287               |
| CCR7           | F: GGTGGCTCTCCTTGTCATTTTC<br>R: AGGTTGAGCAGGTAGGTATCCG | 264               |
| VEGF           | F: AGGAGTACCCCGACGAGATAGA<br>R: CACATCTGCTGTGCTGTAGGAA | 198               |
| BMP-2          | F: AACGAGAAAAGCGTCAAGCC<br>R: AGGTGCCACGATCCAGTCAT     | 119               |
| $\beta$ -actin | F: GTGACGTTGACATCCGTAAAGA<br>R: GTAACAGTCCGCCTAGAAGCAC | 287               |

**Table S3.** Primers used in the RT-PCR of rBMSC cells.

| Gene           | Primers Sequence (F, forward; R, reverse; 5'-3')    | Product Size (bp) |
|----------------|-----------------------------------------------------|-------------------|
| ALP            | F: ATGCTCAGGACAGGATCAAA<br>R: CGGGACATAAGCGAGTTTCT  | 78                |
| COL-I          | F: AGCTCGATACACAATGGCCT<br>R: CCTATGACTTCTGCGTCTGG  | 209               |
| RUNX-2         | F: ATCATTCAAGTGACACCACCA<br>R: GTAGGGGCTAAAGGCAAAAG | 141               |
| OCN            | F: CAGACAAGTCCCACACAGCA<br>R: CCAGCAGAGTGAGCAGAGAG  | 85                |
| $\beta$ -actin | F: CCTCTATGACAACACAGT<br>R: AGCCACCAATCCACACAG      | 155               |
